# Supplementary material for: Enhancement of photocatalytic efficacy by exploiting copper doping in nano-hydroxyapatite for degradation of Congo red dye
Source: Royal Society of Chemistry journal article supplement (doi:10.1039/d2ra06294a), 2022-01-01
Supplement: d2ra06294a1.pdf [file d2ra06294a1.pdf]

## Enhancement of photocatalytic efficacy exploiting copper doping in nano-hydroxyapatite for degradation of Congo Red dye

Md. Sahadat Hossain, Supanna Malek Tuntun, Newaz Mohammed Bahadur and Samina Ahmed

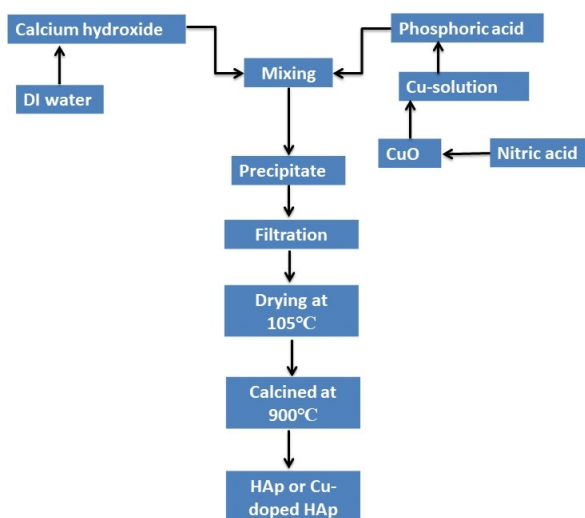

Scheme S\_1: Preparation process of HAp and Cu-doped HAp

### 2.4. Adsorption study

For the assessment of adsorption activity of synthesized samples, 20 ppm of dye solution was prepared using solid dye and DI water, and the experiment was performed under dark condition following a methodology as described in the respective section. The removal percentage ( $R_p$ ) of samples was computed utilizing the following equation (Eq. 13), where  $C_0$  and  $C_t$  represent the initial

and final (at time “t”) concentration, respectively<sup>1</sup>. The adsorption capacity ( $q_e$ ) of the adsorbent was enumerated with the aid of equation 14, where W and V denote the weight of the adsorbent and the volume of the aqueous solution of adsorbate, respectively<sup>2,3</sup>. The removal percentage and adsorption capacity were calculated in percentage and mg/g basis, respectively.

### Crystallite size calculation using various models

#### Linear straight-line method of Scherrer's equation

Determination of crystallite size of crystalline materials is very important for any precise characterization and applications. Thus, crystallite sizes of synthesized HAp samples were calculated by using different model equations.  $D_L$  (crystallite size from the linear straight-line method of Scherrer's equation) was calculated from the modified form of Scherrer's equation, known as the linear straight-line method of Scherrer's equation is given as follows,

$$\cos \theta = \frac{K\lambda}{Dc} \times \frac{1}{\beta} = \frac{K\lambda}{DL} \times \frac{1}{\beta} \quad (1)$$

Equation 1 was compared with the linear straight line equation as below,

$$y = mx + c \quad (2)$$

A graphical scheme was prepared by using equation 1 where  $\cos \theta$  (in degree) was plotted in the y-axis and  $\frac{1}{\beta}$  (in radian) in the x-axis. Fig 1 shows the prepared graphs for the samples. The slope  $m = \frac{K\lambda}{DL}$  was obtained by comparing equation 1 & 2 which was used to calculate the crystallite size,  $D_L$ . Because of the too large crystallite size, this method is invalid for synthesized HAp samples.

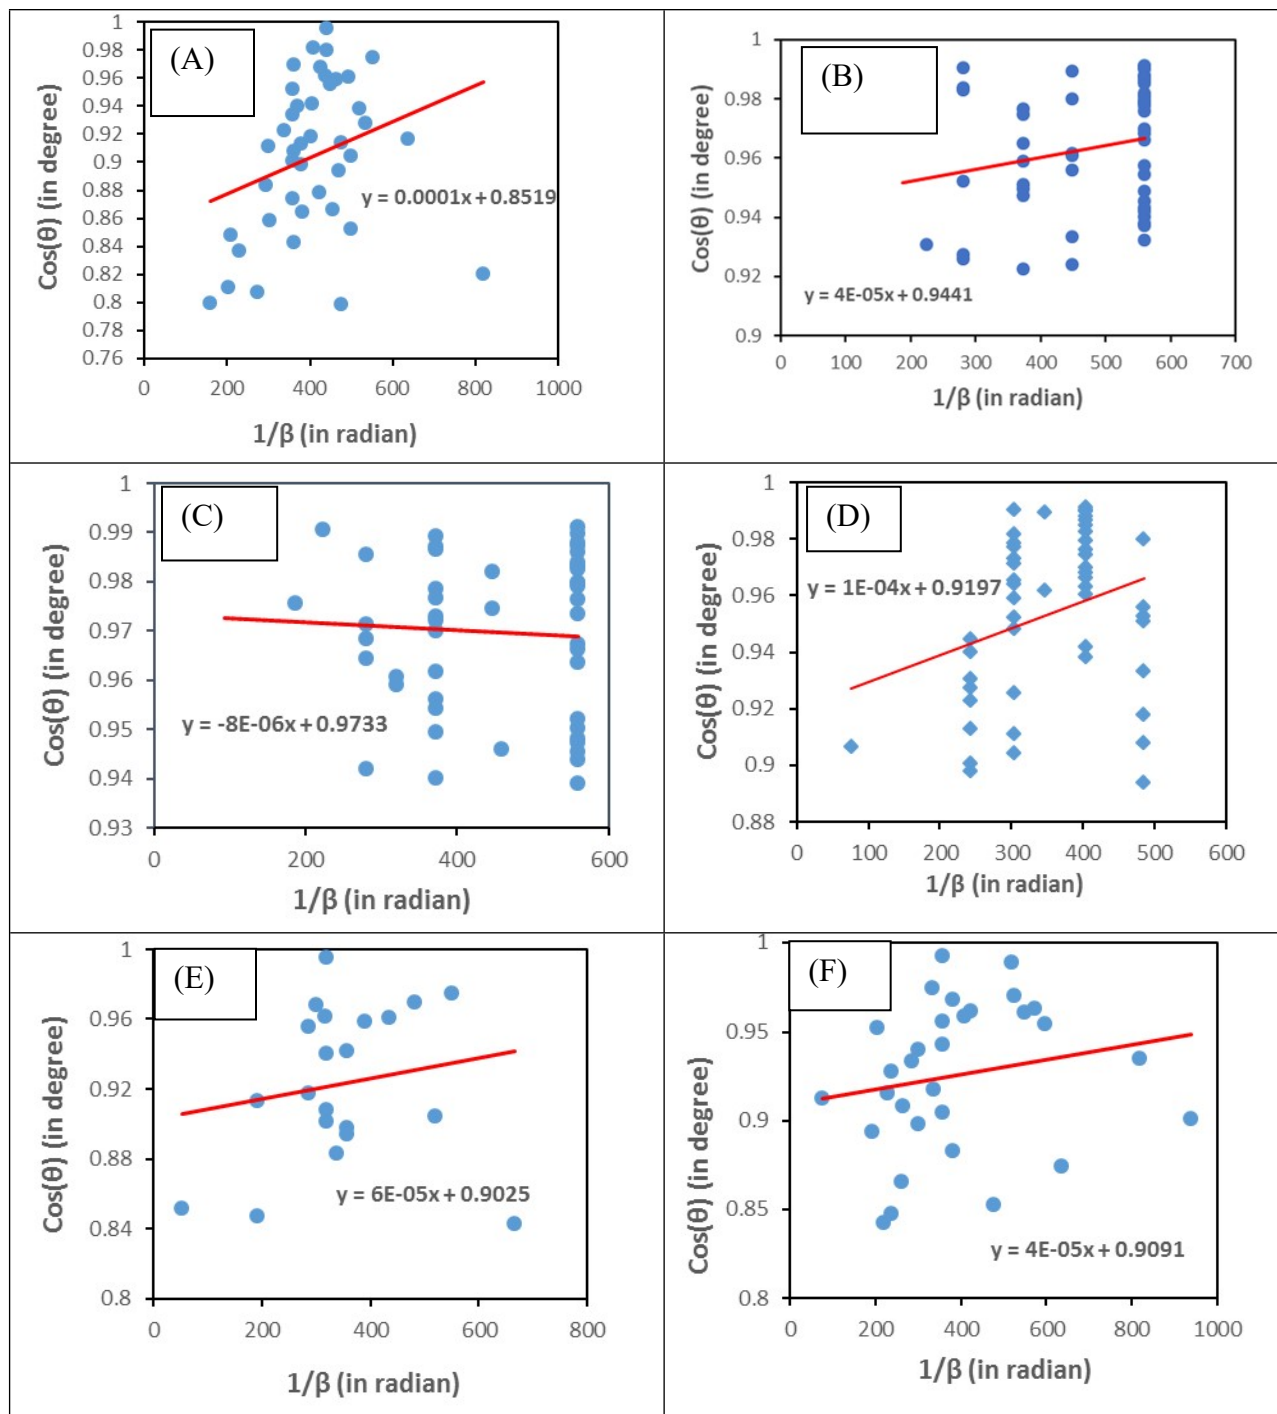

**Figure S\_1:** Graphical representation of crystallite size for (A) HAp, (B) 0.32 Cu HAp, (C) 0.63 Cu HAp, (D) 1.25 Cu HAp, (E) 2.5 Cu HAp, (F) 5 Cu HAp using liner straight line method of Scherrer's equation.

### Monshi- Scherrer method

The crystallite size of synthesized HAPs was also calculated by using the Monshi-Scherrer method or modified Scherrer formula (equation 3) where the

crystallite size was represented by  $D_M$ . The equation was formed by rearranging and taking 'ln' in Scherrer's equation which is as follows,

$$\text{Monshi-Scherrer method, } \ln \beta = \ln \frac{1}{\cos \theta} + \ln \frac{K\lambda}{DM} \quad (3)$$

From equation 3,  $\ln \beta$  (in radian) was plotted in the y-

axis and  $\ln \frac{1}{\cos \theta}$  (in degree) in the x-axis. The

obtained graphs are included in Fig. 2. Equation 2 & 3 were compared and written as below,

$$\ln \frac{K\lambda}{DM} = \text{intercept} \quad (4)$$

$$\text{or, } \frac{K\lambda}{DM} = e^{(\text{intercept})} \quad (5)$$

The crystallite sizes ( $D_M$ ) were calculated by taking intercepts using equation 3. The resultant values were identical to the values calculated by using Scherrer's formula. So it can be presumed that Monshi-Scherrer method is valid for synthesized HAp samples.

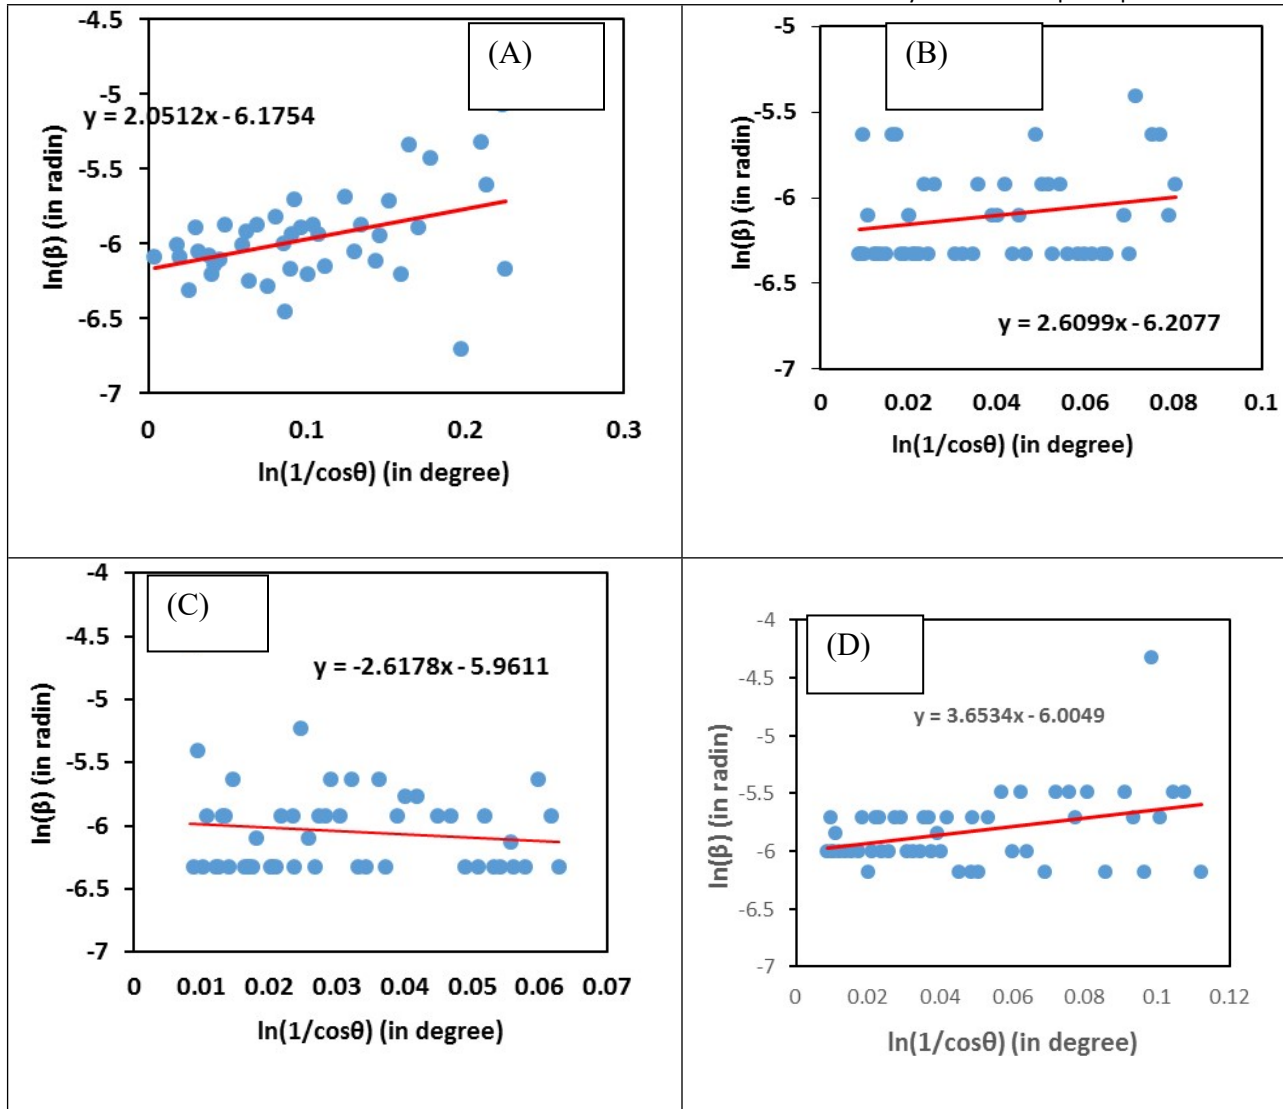

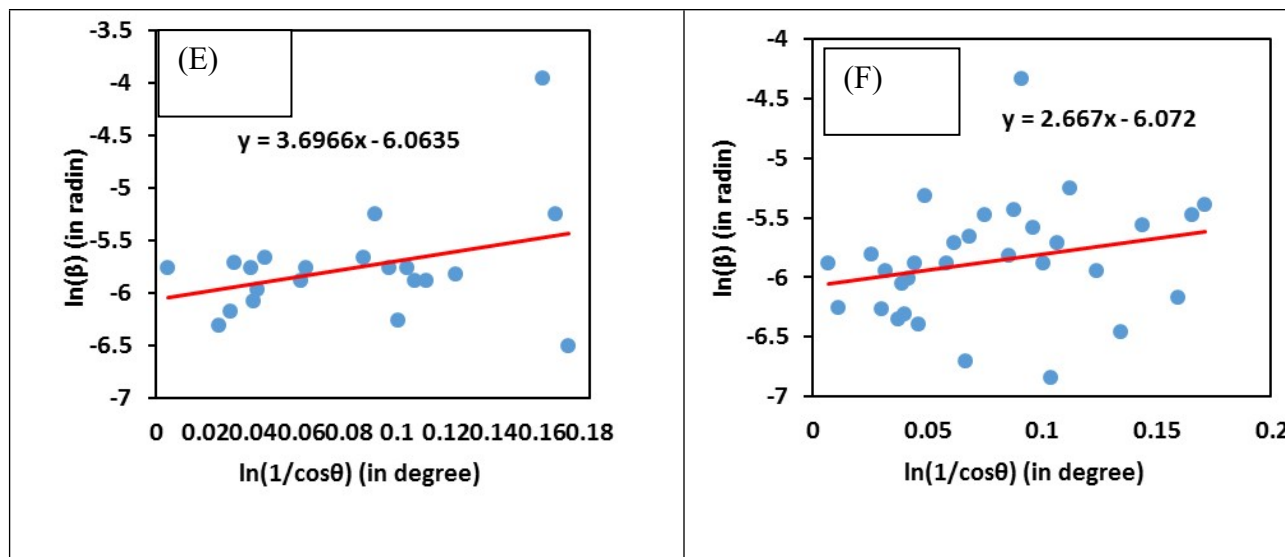

**Figure S\_2:** Graphical representation of crystallite size for (A) HAp, (B) 0.32 Cu HAp, (C) 0.63 Cu HAp, (D) 1.25 Cu HAp, (E) 2.5 Cu HAp, (F) 5 Cu HAp using Monshi-Scherrer method.

**Williamson-Hall method**

To calculate the crystallite size which is very important for nanocrystals through the grain boundaries, point defects, dislocation and stacking, the William-Hall method is the best choice. The equation is given below.

$$\beta_{\text{total}} \cos \theta = \frac{K_B \lambda}{D_W} + 4\epsilon \sin \theta \quad (6)$$

Fig. 3 was obtained by plotting  $4 \sin \theta$  (in degree) and  $\beta_{\text{total}} \cos \theta$  (in radian, degree) in the x-axis and y-axis respectively. Equation 6 and 2 were compared and the intercept,  $y$  was computed from the graphs equal to

$\frac{K_B \lambda}{D_W}$ , the value  $\frac{K_B \lambda}{D_W}$ , which was applied to calculate the crystallite sizes of the synthesized samples.

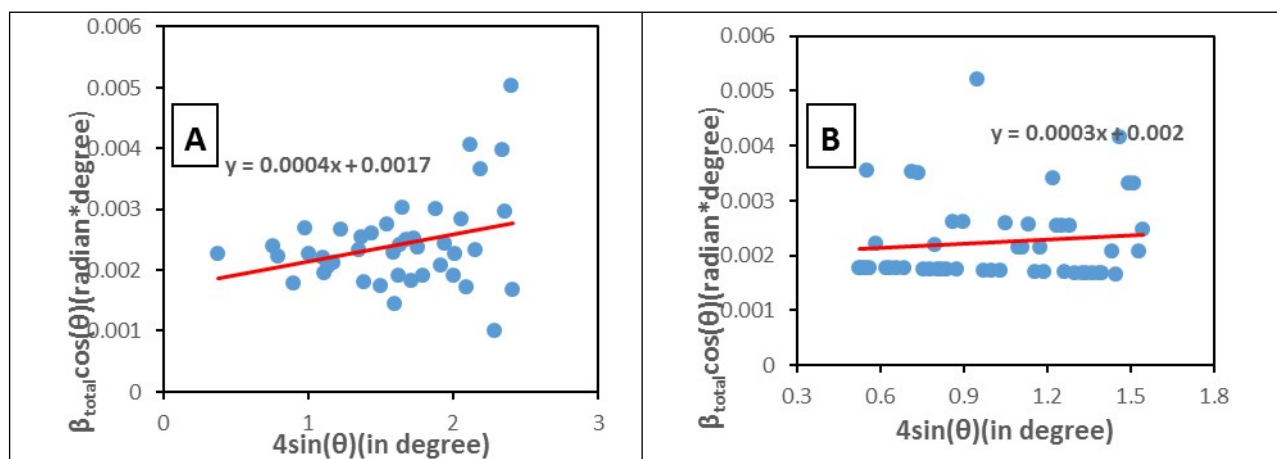

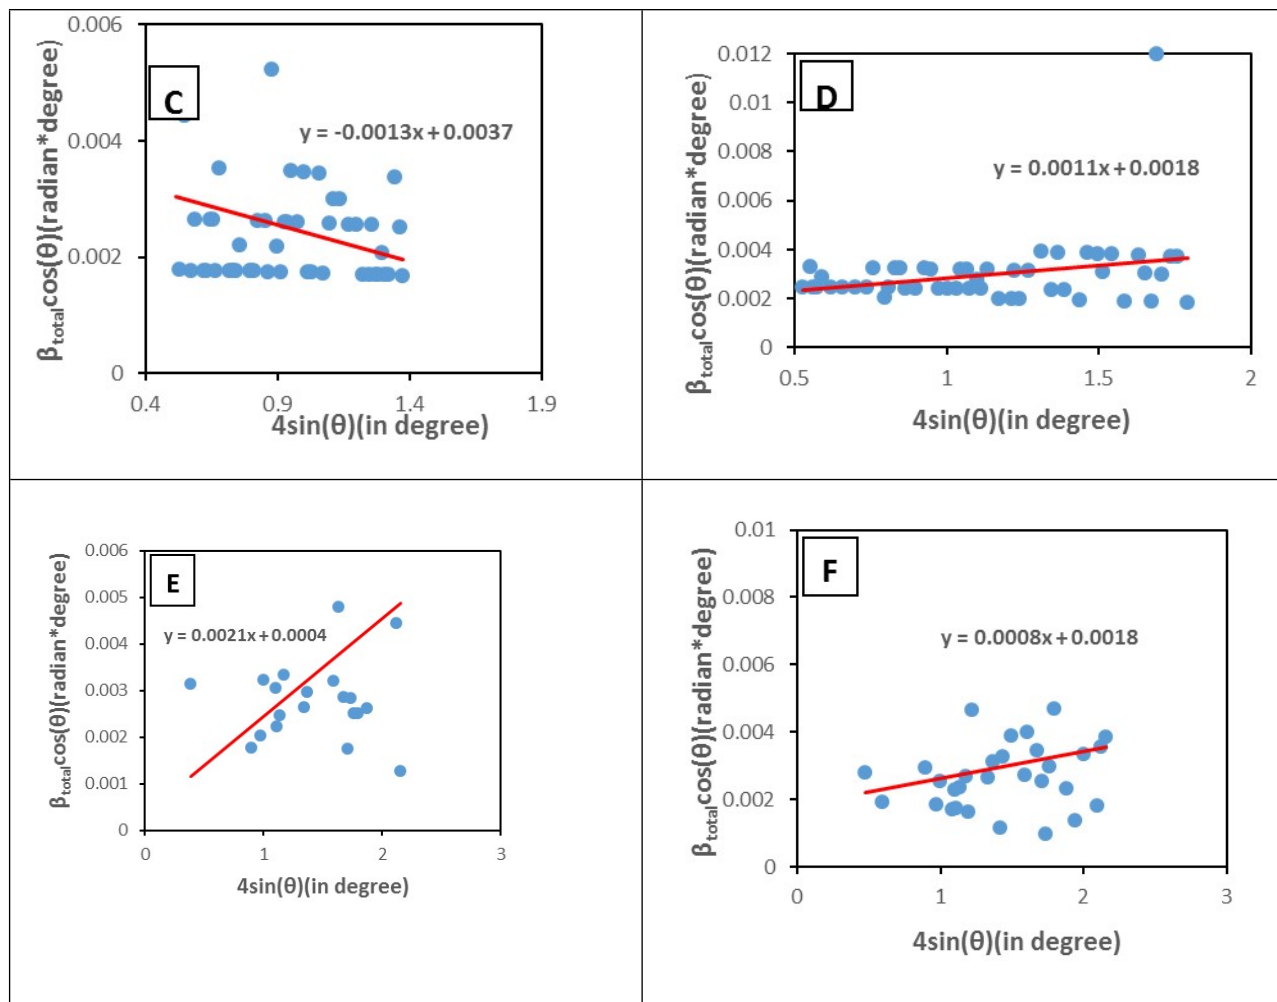

**Figure S\_3:** Graphical representation of crystallite size for (A) HAp, (B) 0.32 Cu HAp, (C) 0.63 Cu HAp, (D) 1.25 Cu HAp, (E) 2.5 Cu HAp, (F) 5 Cu HAp using Williamson-Hall method.

Figure S\_4: Optical band gap of synthesized HAP

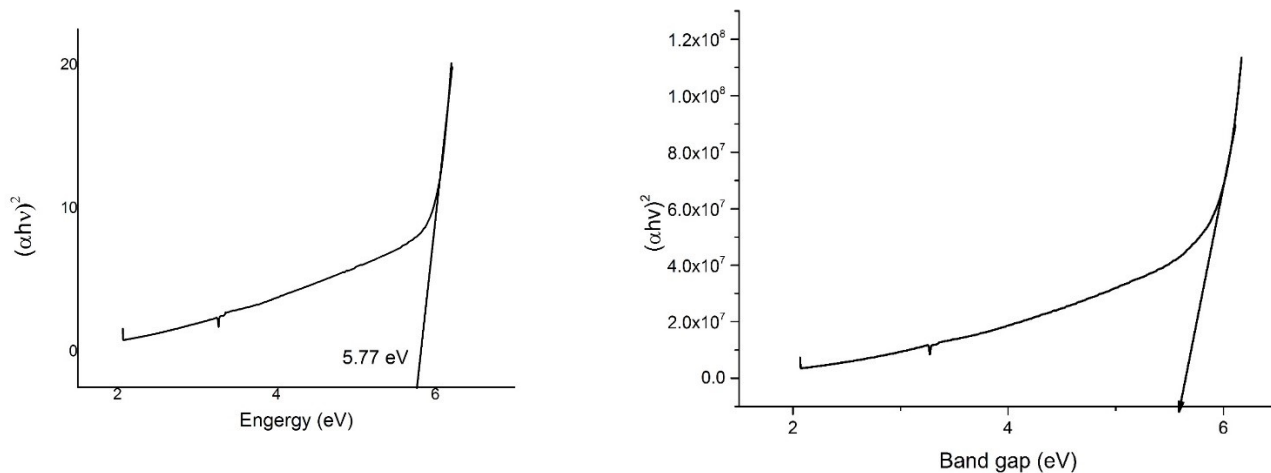

5.59 eV

Figure S\_5: Optical band gap of synthesized 0.32Cu\_Hap

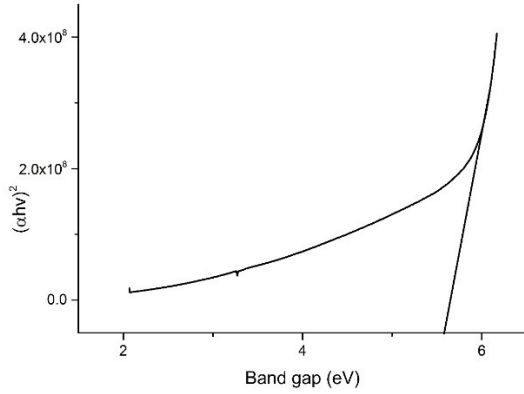

Figure S\_6: Optical band gap of synthesized 0.63Cu\_HAp

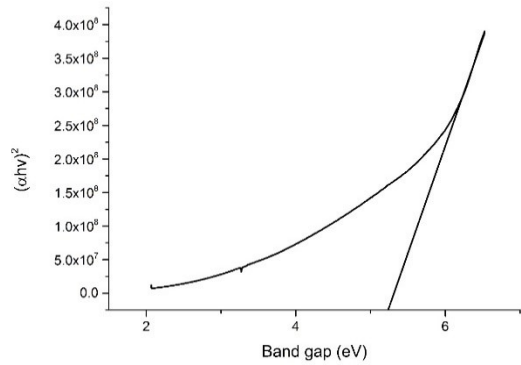

Figure S\_7: Optical band gap of synthesized 1.25Cu\_HAp

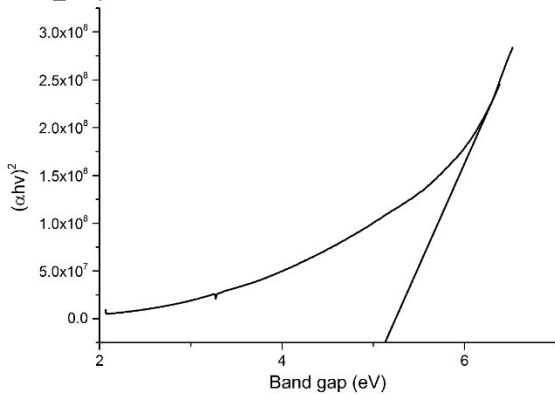

Figure S\_8: Optical band gap of synthesized 2.5Cu\_HAp

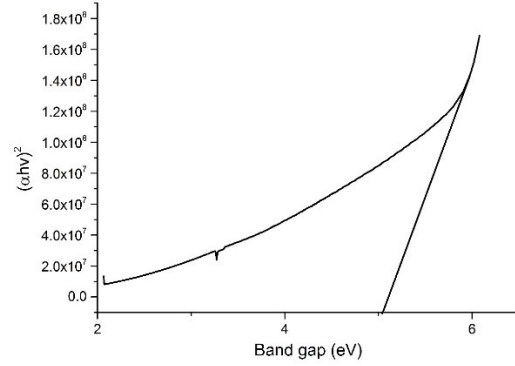

Figure S\_9: Optical band gap of synthesized 5.0Cu\_HAp

### Adsorption study

#### 3.2. Adsorption

The adsorption study was carried out to confine the dye molecule on the surface of the adsorbate or trap it on the bulk of the porous samples maintaining 180 min contact time, 0.2g adsorbent dose, 50 mL volume of 20 ppm solution. Dye molecules' diffusion to the active surface varied on the basis of the interaction of the adsorbate and adsorbent, and this interaction was controlled by changing the rotation (0-200 rpm) of the orbital shaker. The adsorbance percentages and capacity are presented in supplementary figure S\_10, and the values were augmented with the rise of interaction (rpm) up to a certain limit, and after that, no significant variation was detected. This maximum limit of adsorption was achieved either by occupying the active surface for adsorbance or by filling up the pore volume of materials. Though all the prepared samples inherited excellent adsorption properties, the 0.63\_Cu\_HAp exhibited higher activity (adsorbance 93% and capacity 4.5 mg/g) than the others. The nature of the adsorption process was investigated employing adsorption isotherm estimation<sup>4,5</sup> with the assistance of two frequently used adsorption isotherms namely Langmuir and Freundlich adsorption isotherms. The removal/adsorbance percentage and adsorption capacity are significantly influenced by the initial concentration of Congo red dye and are revealed here in supplementary figure S\_11. With the increment of initial concentration from 10 to 80 ppm, the removal percentage was considerably lessened but the removal capacity was linearly and sharply augmented. Any kind of adsorption process generates secondary waste materials which are also hazardous for the environment and additional disposal technique needs to be carried out. Thus, no further attention

was given to the adsorption process and we jumped to the photo catalysis technique.

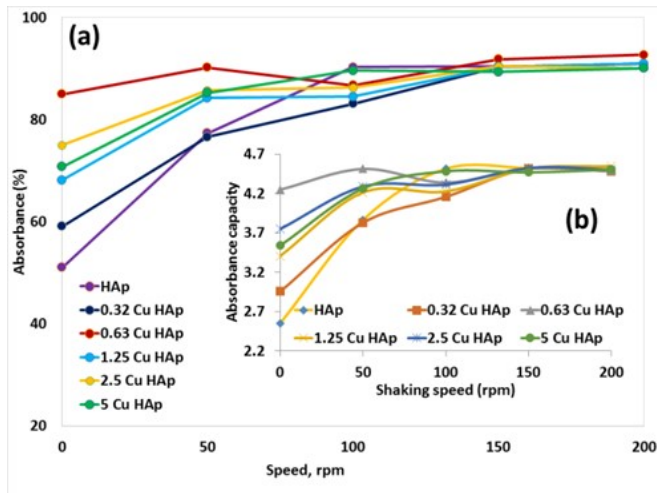

Figure S\_10: Adsorption percentage and adsorption capacity of Congo red dye at different shaking speed [(a) absorbance (b) capacity]

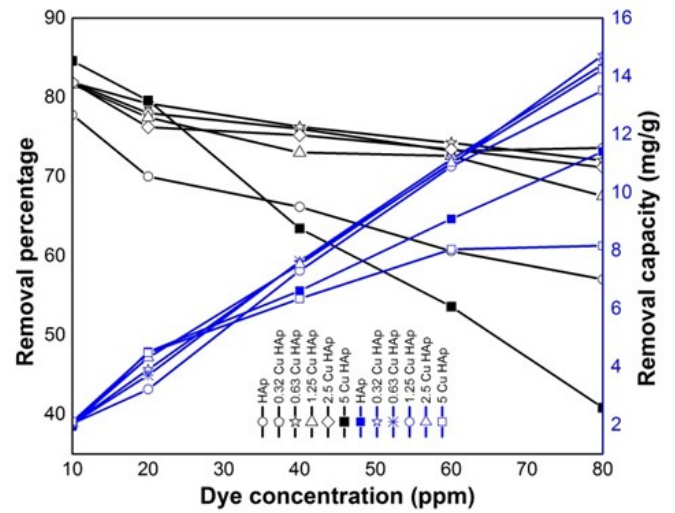

Figure S\_11: Adsorption percentage and adsorption capacity of Congo red dye at a diverse initial concentration

**Time optimization:**

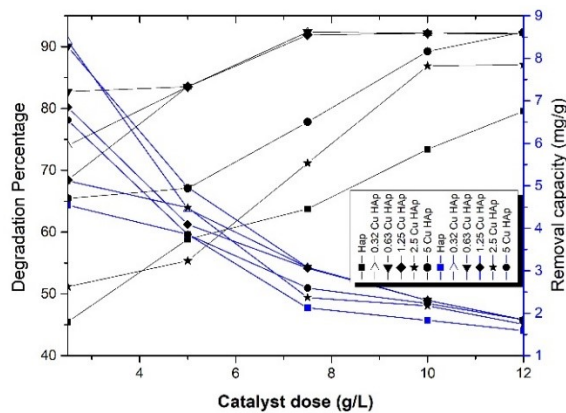

Figure S\_12: Influence of various doses of photocatalyst with fixed 20 ppm Congo red dye

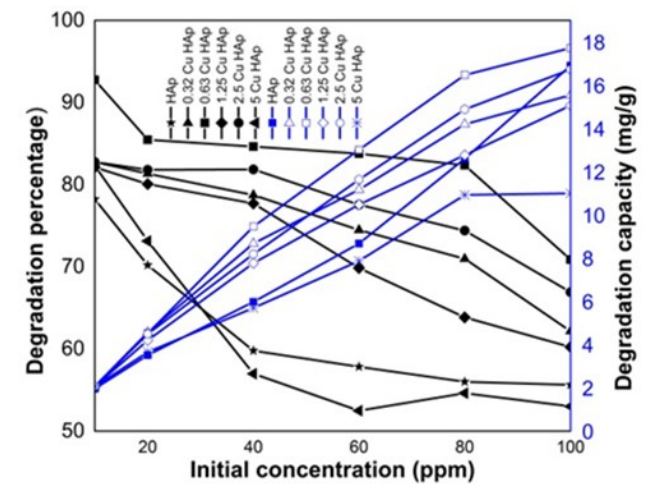

Figure S\_13: Influence of different initial dye concentration for 0.2 g photocatalyst

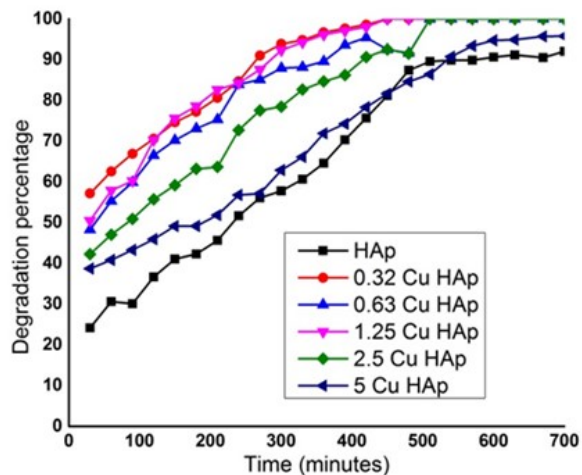

Figure S\_14: Photodegradation percentages in terms of different time interval for catalyst dose of 0.1 g

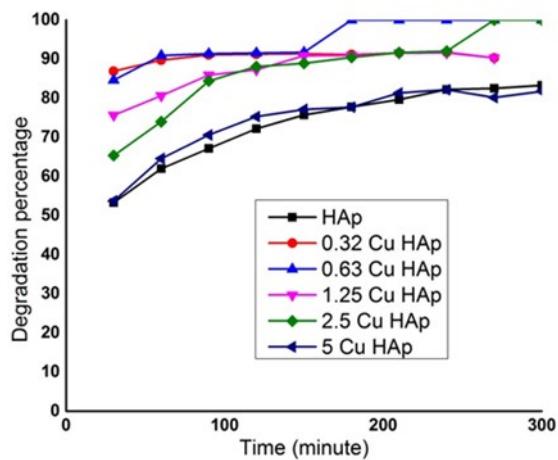

Figure S\_15: Photodegradation percentages in terms of different time interval for catalyst dose of 0.2 g

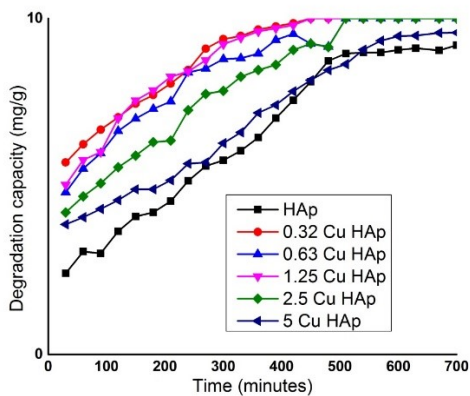

Figure S\_16: Photo degradation capacity in terms of different time interval for catalyst dose 0.1 g

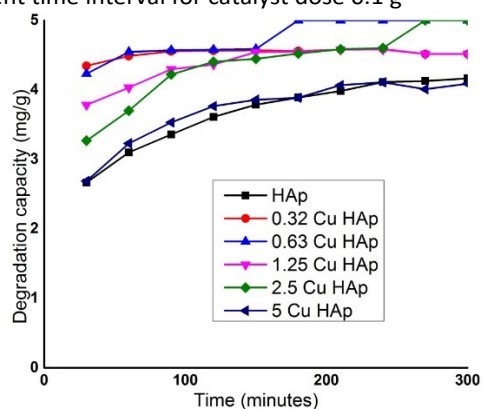

Figure S\_17: Photo degradation capacity in terms of different time interval for catalyst dose 0.2 g

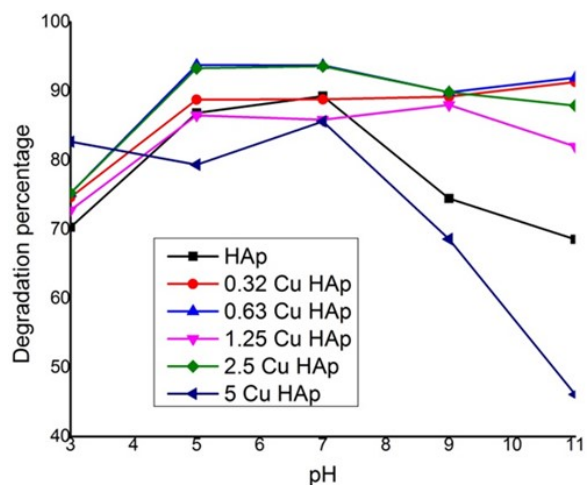

Figure S\_18: Photochemical degradation percentage under different pH at 180 min, 50 mL of 20 ppm Congo red dye solution



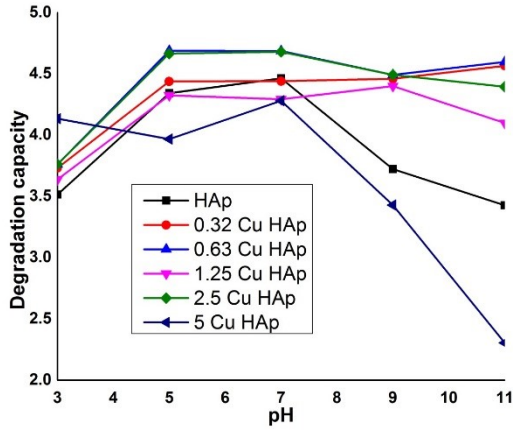

Figure S\_19: Photochemical degradation capacity under different pH at 180 minutes, 50 ml of 20 ppm Congo red dye solution

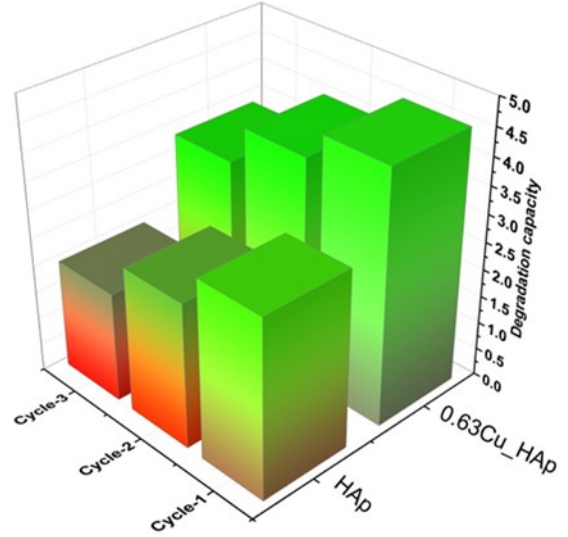

Figure S\_21: Reuse property of pure HAp and 0.63Cu\_HAp in terms of degradation capacity

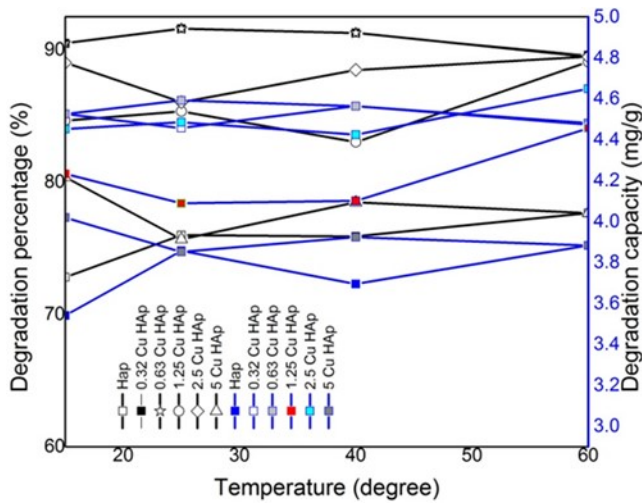

Figure 20: Influence of temperature on the photocatalytic efficiency of Congo red dye

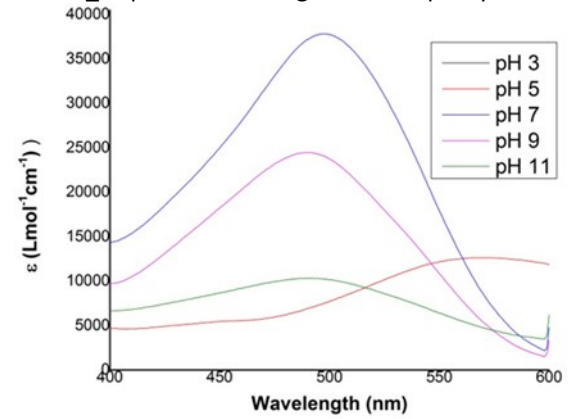

Figure S\_22: Molar extinction coefficient of Congo red dye at various pH and fixed solution concentration  $2.87 \times 10^{-5}$  M (=20ppm)

## Beer-Lambert law

The Beer-lambert law can be mathematically expressed as:

$$A = \epsilon LC \quad (13)$$

Here, A= absorbance of radiation energy, C = concentration of the species, L = length of cuvette, and  $\epsilon$  = proportionality constant. The proportionality constant is called molar absorptivity or extinction coefficient when cuvette length is measured in centimeter and concentration is expressed in molarity. By rearranging equation (13) we get molar extinction co-efficient

$$\varepsilon = \frac{A}{LC}$$

(14)

For the Congo red of 20 ppm ( $2.87 \times 10^{-5}$  M) and 1 cm cuvette length the molar extinction co-efficient was calculated at UV-vis spectral range.

Table S\_1: Average calculated molar absorptivity

| Sample ID | $\varepsilon$ (Lmol <sup>-1</sup> cm <sup>-1</sup> ) | Sample ID | $\varepsilon$ (Lmol <sup>-1</sup> cm <sup>-1</sup> ) |
|-----------|------------------------------------------------------|-----------|------------------------------------------------------|
| pH 3      | 8441.46                                              | 10 ppm    | 14668.29                                             |
| pH 5      | 8441.46                                              | 20 ppm    | 22346.69                                             |
| pH 7      | 22346.69                                             | 40 ppm    | 19459.76                                             |
| pH 9      | 14668.29                                             | 60 ppm    | 9951.22                                              |
| pH 11     | 7622.30                                              | 80 ppm    | 3667.189                                             |
| -         | -                                                    | 100 ppm   | 1642.073                                             |

### Photodegradation kinetics

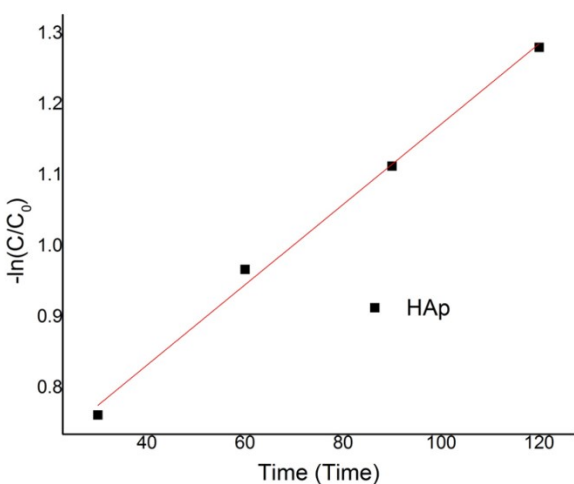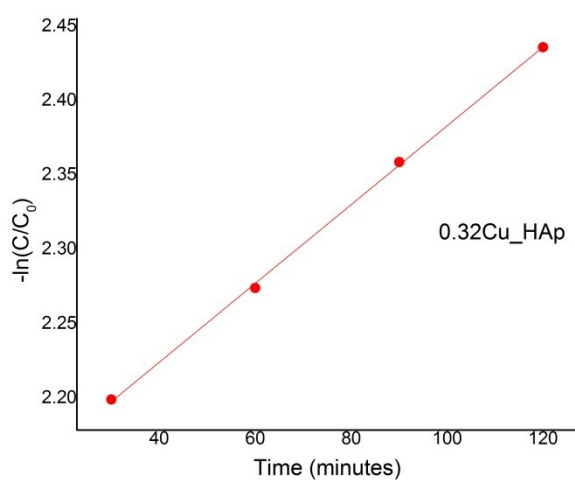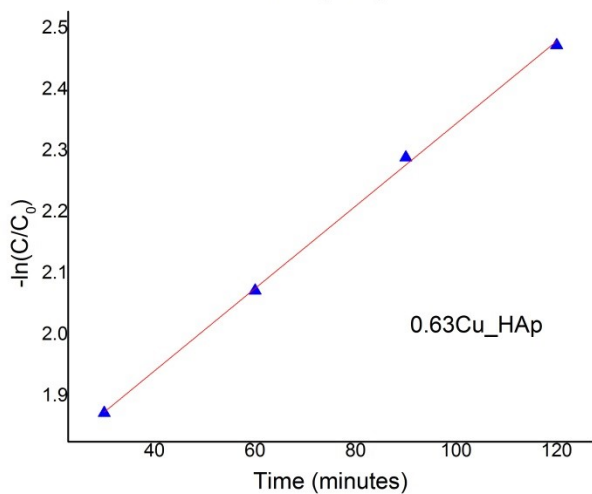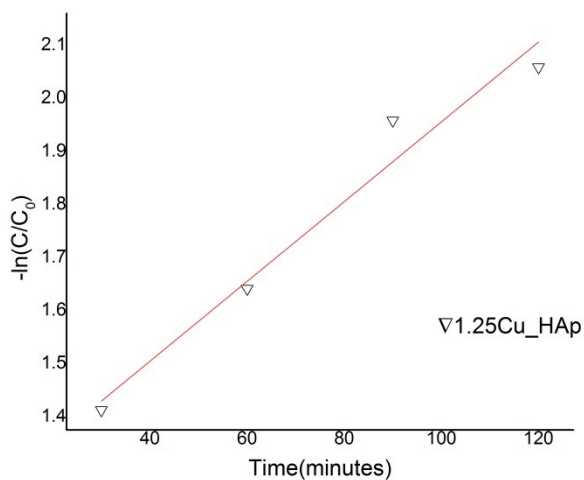

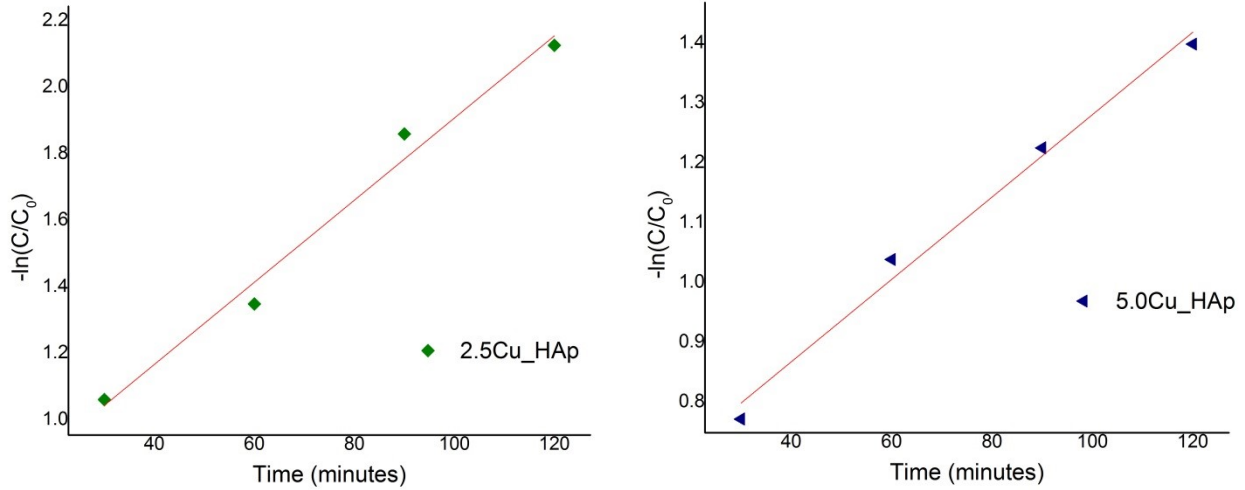

Figure S\_23: Plot of  $-\ln(C/C_0)$  against time (minutes) for various samples to calculate reaction rate constant for 0.2 g photo catalyst

Table S\_2: Generated values of liner fit using Origin pro 9 software for different samples of 0.1 g photo catalyst dose

| Column1     | Intercept | Intercept2     | Slope   | Slope3         | Statistics    |
|-------------|-----------|----------------|---------|----------------|---------------|
|             | Value     | Standard Error | Value   | Standard Error | Adj. R-Square |
| HAp         | 0.21498   | 0.02225        | 0.00199 | 1.47E-04       | 0.9631        |
| 0.32 Cu HAp | 0.685     | 0.03055        | 0.00467 | 2.02E-04       | 0.98708       |
| 0.63 Cu HAp | 0.48505   | 0.06784        | 0.00494 | 4.48E-04       | 0.94516       |
| 1.25 Cu HAp | 0.50547   | 0.0406         | 0.00474 | 2.68E-04       | 0.98496       |
| 2.5 Cu HAp  | 0.43187   | 0.04395        | 0.0032  | 2.90E-04       | 0.94525       |
| 5 Cu HAp    | 0.43285   | 0.01855        | 0.00153 | 1.22E-04       | 0.95695       |

Table S\_3: Generated values of liner fit using Origin pro 9 software for different samples of 0.2 g photo catalyst dose

| Column1     | Intercept | Intercept2     | Slope    | Slope3         | Statistics    |
|-------------|-----------|----------------|----------|----------------|---------------|
|             | Value     | Standard Error | Value    | Standard Error | Adj. R-Square |
| HAp         | 0.60499   | 0.02277        | 0.00567  | 2.77E-04       | 0.99286       |
| 0.32 Cu HAp | 2.11778   | 0.00345        | 0.00595  | 4.20E-05       | 0.99925       |
| 0.63 Cu HAp | 1.67171   | 0.01235        | 0.00672  | 1.50E-04       | 0.9985        |
| 1.25 Cu HAp | 1.20263   | 0.08113        | 0.00652  | 9.88E-04       | 0.95003       |
| 2.5 Cu HAp  | 0.67044   | 0.09113        | 0.00536  | 0.00111        | 0.97622       |
| 5 Cu HAp    | 0.59084   | 0.04246        | 0.005189 | 5.17E-04       | 0.98331       |

### Freundlich adsorption isotherm

Heterogeneous surface with multilayer adsorption was estimated employing an empirical equation

commonly known as Freundlich adsorption isotherm and the mathematical expression can be written as:

$$\frac{x}{m} = K_F C_e^{\frac{1}{n}}$$

(7)

Taking logarithm in both sides, equation (7) can be express as:

$$\log\left(\frac{x}{m}\right) = \log(K_F) + \frac{1}{n} \log(C_e^n) \quad (8)$$

Or,

$$\log\left(\frac{x}{m}\right) = \log(K_F) + \frac{1}{n} \log(C_e^n) \quad (9)$$

By rearranging equation (8), equation (9) can be generated

$$\log(q_e) = \log(K_F) + \frac{1}{n} \log(C_e^n) \quad (10)$$

Where, x= mass of adsorbate, m= mass of adsorbent, q<sub>e</sub>= reaction capacity, K<sub>F</sub> = Frenlich constat denotes the adsorption capacity of adsorbent, n= another constant explains the adsorption process such as excellent adsorption (2 < n < 10), fairly complex adsorption (1 < n < 2) or difficult adsorption process (n < 1).

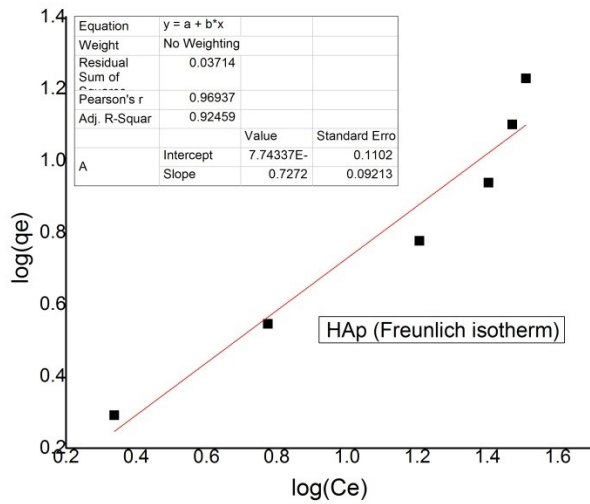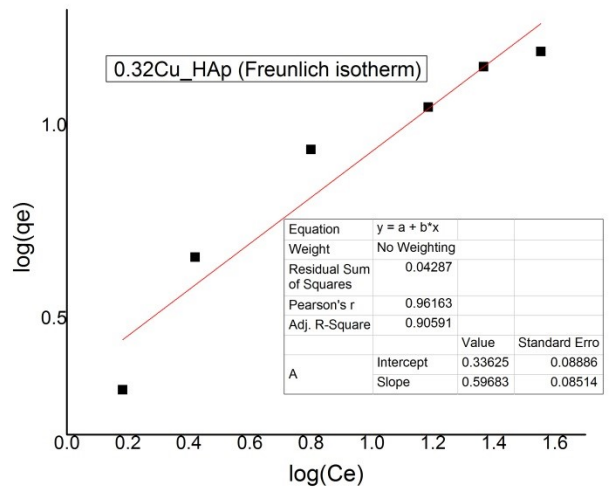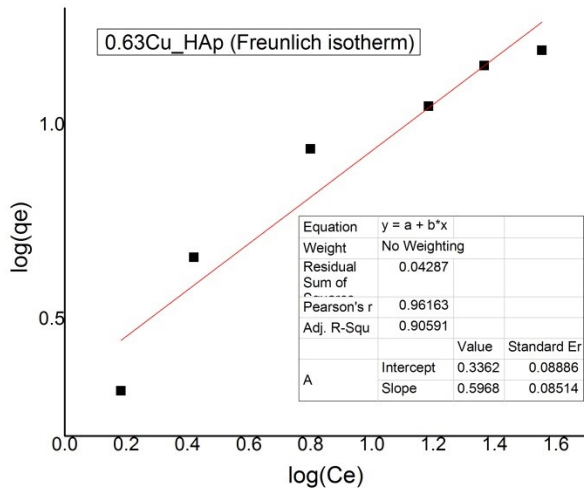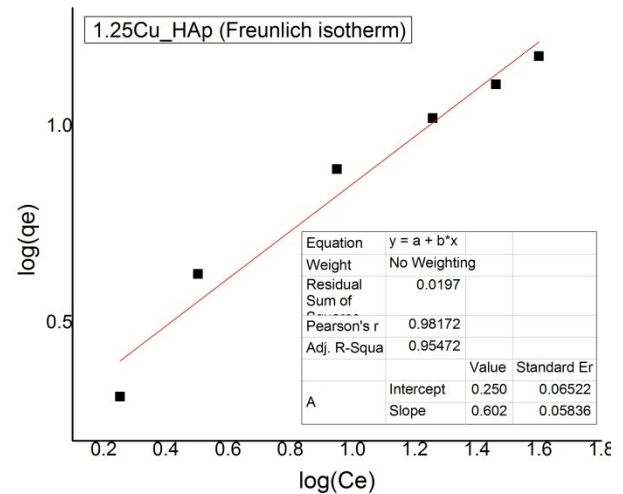

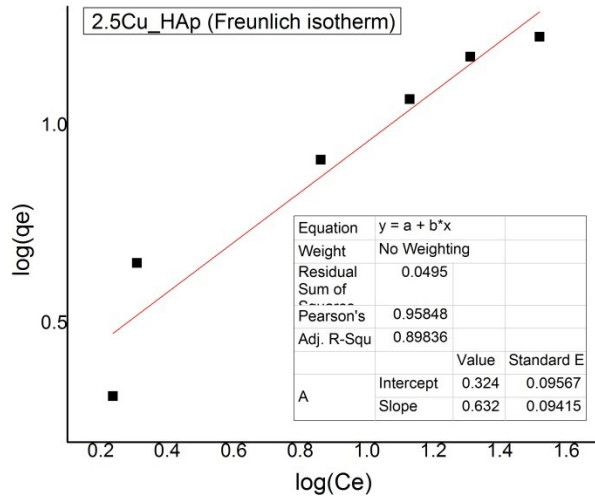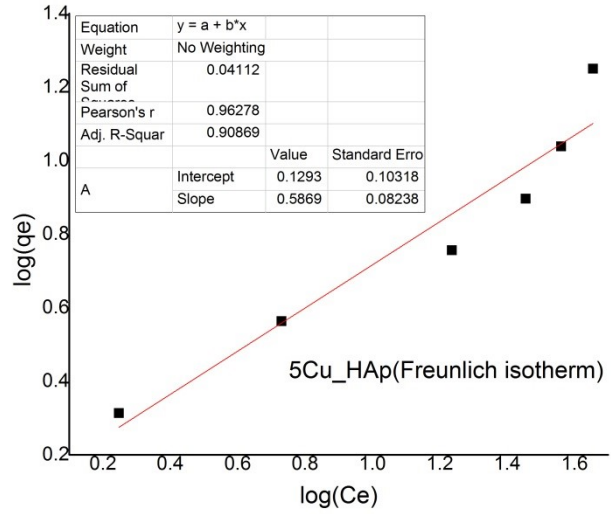

Figure S\_24: Graphical presentation of Freundlich adsorption isotherm

### S\_3: Langmuir adsorption isotherm

The linear form of Langmuir adsorption isotherm:

$$\frac{C_e}{q_e} = \frac{1}{K_L q_{max}} + \frac{C_e}{q_{max}} \quad (11)$$

Where,  $C_e$  = equilibrium concentration,  $q_e$  = adsorption capacity at equilibrium condition,  $q_{max}$  = maximum adsorption capacity,  $K_L$  = Langmuir adsorption constant.

By plotting  $C_e/q_e$  in y-axis and  $C_e$  in x-axis, straight line was built up and comparing slope and intercept

with straight line ( $y=mx+c$ )  $K_L$  and  $q_{max}$  were calculated. Another dimensionless equilibrium parameter ( $R_L$ ) was estimated from the Langmuir adsorption constant ( $K_L$ ) and manifested as equation (12).

$$R_L = \frac{1}{1 + K_L C_{max}} \quad (12)$$

If,  $R_L = 1$ , isotherm is linear, if,  $0 < R_L < 1$  explains appropriate adsorption,  $R_L > 1$  express disagreeable adsorption isothermal situation,  $R_L = 0$  articulates irreversible adsorption.

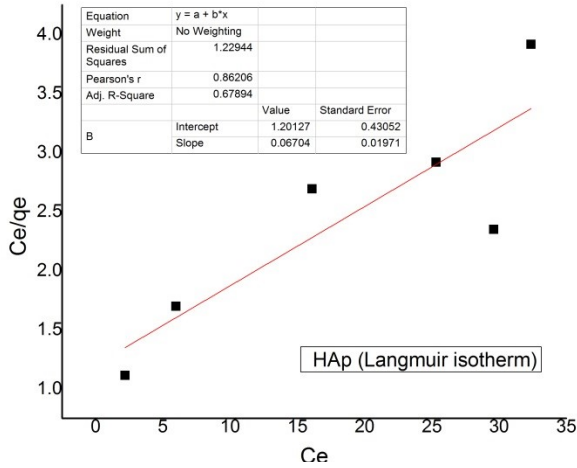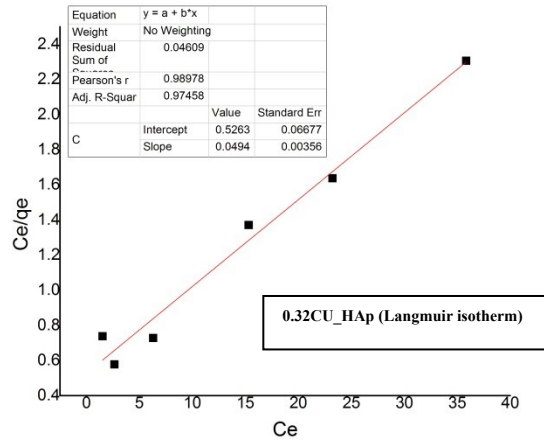

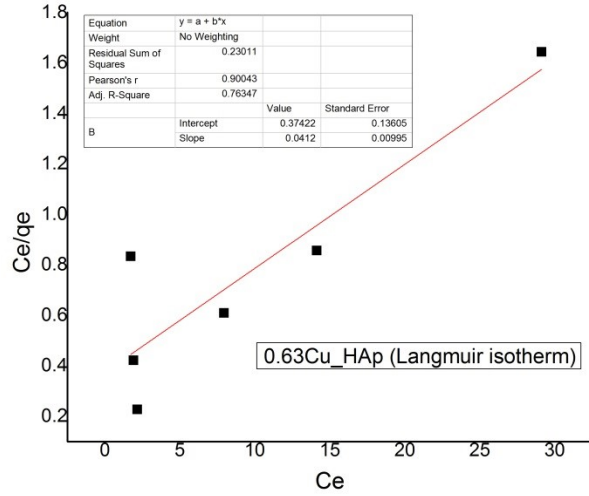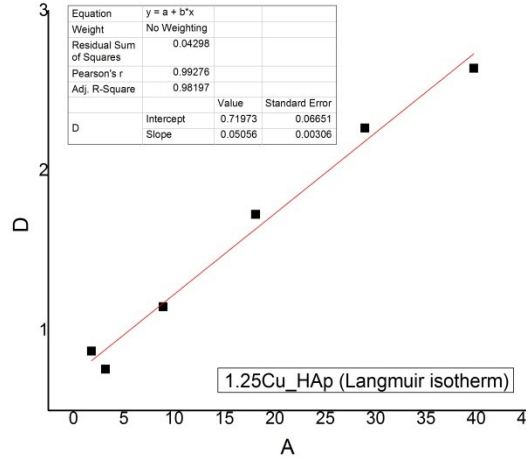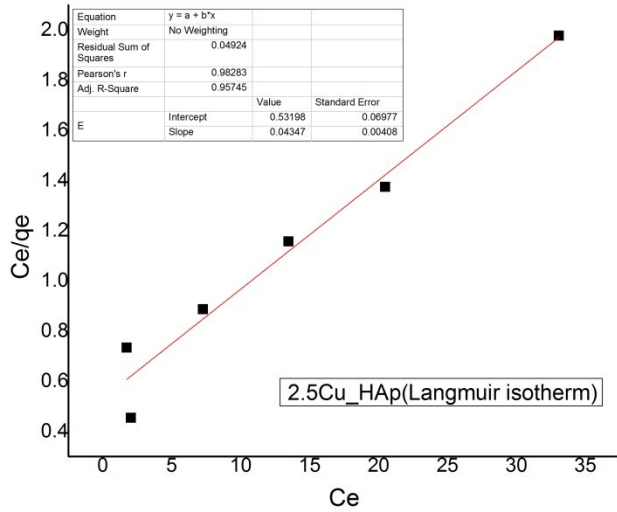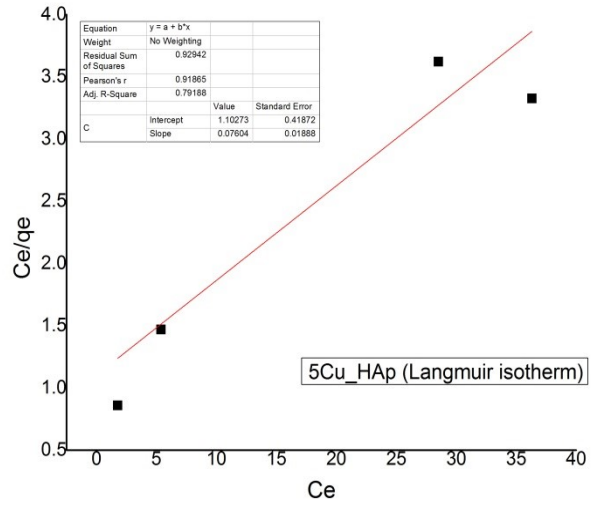

Figure S\_25: Pictorial plot of Langmuir adsorption isotherm

### Photo-degradation kinetics

If illumination is weakly absorbed by the system, HAp is well known weak photocatalyst, and then equation 18 can be simplified as first-order rate expression:

$$r = \left(-\frac{dC}{dt}\right) = 2.303E_{n,p,o}^0 \left(\frac{S}{V}\right) l \epsilon \phi C \quad (17)$$

If the rate constant ( $K_1$ ) is taken as equation (17), the rate of first order reaction can be mathematically presented as equation (18).

$$K_1 = 2.303E_{n,p,o}^0 \left(\frac{S}{V}\right) l \epsilon \phi \quad (18)$$

$$\left(-\frac{dC}{dt}\right) = K_1 C \quad (19)$$

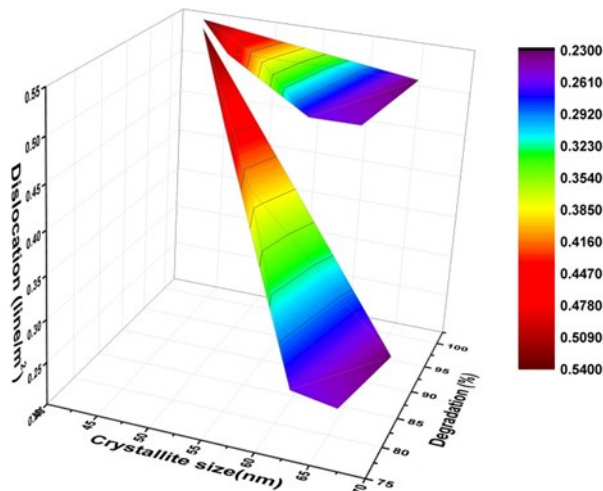

Figure S\_26: Relationship among degradation percentage, crystallite size and dislocation density using Monshi-Scherrer method

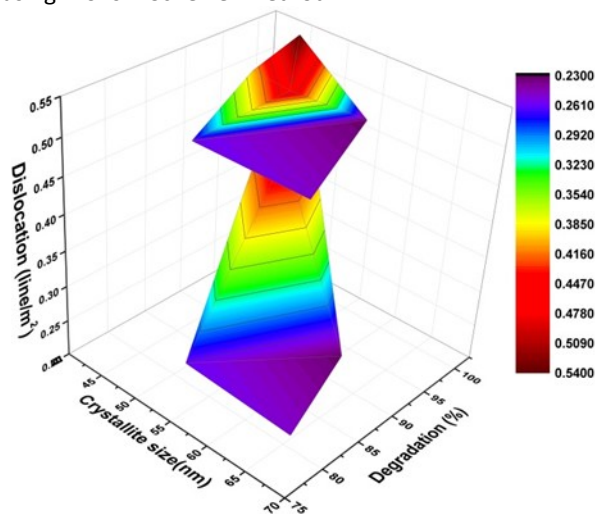

Figure S\_27: Relationship among degradation percentage, crystallite size and dislocation density using William-Hall method

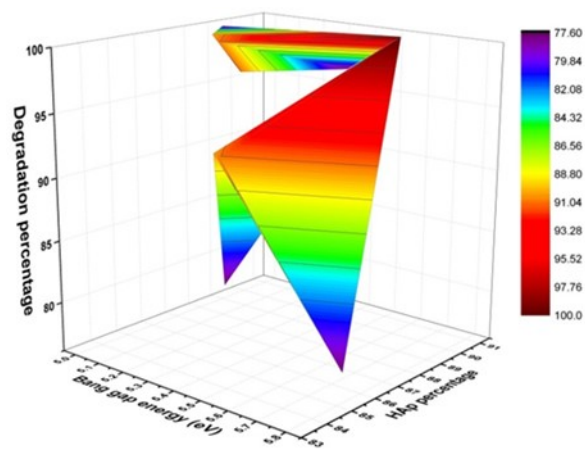

Figure S\_28: Correlation among degradation percentage, percentage of HAp form and optical band gap energy

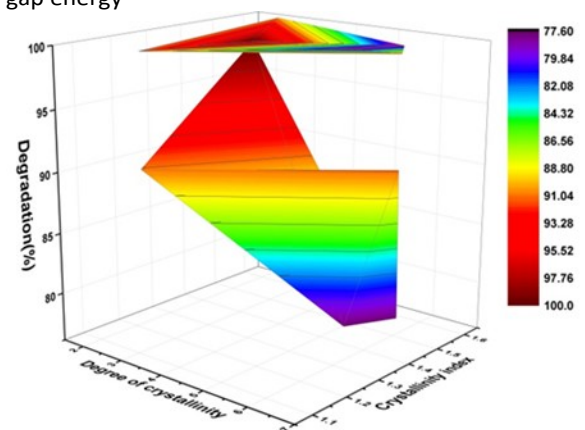

Figure S\_29: Relationship among degradation percentage, degree of crystallinity and crystallinity index

### References

- (1) Khan, S. A.; Khan, S. B.; Asiri, A. M. Layered Double Hydroxide of Cd-Al/C for the Mineralization and de-Coloration of Dyes in Solar and Visible Light Exposure. *Scientific reports* **2016**, 6 (1), 1–15.
- (2) Rahaman, M. S.; Hasnine, S. M. M.; Ahmed, T.; Sultana, S.; Bhuiyan, M. A. Q.; Manir, M. S.; Ullah, N.; Sen, S. K.; Hossain, M. N.; Hossain, M. S. Radiation Crosslinked Polyvinyl Alcohol/Polyvinyl Pyrrolidone/Acrylic Acid Hydrogels: Swelling, Crosslinking and Dye Adsorption Study. *Iranian Polymer Journal* **2021**, 1–16.
- (3) Younis, S. A.; Motawea, E. A.; Moustafa, Y. M.; Lee, J.; Kim, K.-H. A Strategy for the Efficient Removal of Chlorophenols in Petrochemical Wastewater by Organophilic and Aminated Silica@Alginate Microbeads: Taguchi Optimization and

Isotherm Modeling Based on Partition Coefficient. *Journal of hazardous materials* **2020**, *397*, 122792.

(4) Zheng, N.; Yin, L.; Su, M.; Liu, Z.; Tsang, D. C. W.; Chen, D. Synthesis of Shape and Structure-Dependent Hydroxyapatite Nanostructures as a Superior Adsorbent for Removal of U(VI). *Chemical Engineering Journal* **2020**, *384*, 123262. <https://doi.org/10.1016/j.cej.2019.123262>.

(5) Ali, J.; Wang, H.; Ifthikar, J.; Khan, A.; Wang, T.; Zhan, K.; Shahzad, A.; Chen, Z.; Chen, Z. Efficient, Stable and Selective Adsorption of Heavy Metals by Thio-Functionalized Layered Double Hydroxide in Diverse Types of Water. *Chemical Engineering Journal* **2018**, *332*, 387–397.
